1 Reovirus core proteins  $\lambda 1$  and  $\sigma 2$  promote stability of disassembly intermediates and  
2 influence early replication events

3

4

5

6 Stephanie Gummersheimer<sup>a</sup> and Pranav Danthi<sup>lab</sup>

7 <sup>a</sup>Department of Biology, Indiana University, Bloomington, Indiana, USA

8

9

10

11

12

13

14 Running Title: Reovirus core proteins influence entry and replication

15

16

17 <sup>b</sup>Corresponding author: Mailing address: Department of Biology, Indiana University 212

18 S. Hawthorne Drive, Bloomington IN 47405. Phone: (812) 856-2449 Fax: (812) 856-

19 5710. E-mail: pdanathi@indiana.edu

## 20 **ABSTRACT**

21 The capsids of mammalian reovirus contain two concentric protein shells, the core and  
22 the outer capsid. The outer capsid is comprised of  $\mu$ 1- $\sigma$ 3 heterohexamers which  
23 surround the core. The core is comprised of  $\lambda$ 1 decamers held in place by  $\sigma$ 2. After  
24 entry into the endosome,  $\sigma$ 3 is proteolytically degraded and  $\mu$ 1 is cleaved and exposed  
25 to form ISVPs. ISVPs undergo further conformational changes to form ISVP\*s, resulting  
26 in the release of  $\mu$ 1 peptides which facilitate the penetration of the endosomal  
27 membrane to release transcriptionally active core particles into the cytoplasm. Previous  
28 work has identified regions or specific residues within reovirus outer capsid that impact  
29 the efficiency of cell entry. We examined the functions of the core proteins  $\lambda$ 1 and  $\sigma$ 2.  
30 We generated a reovirus T3D reassortant that carries strain T1L derived  $\sigma$ 2 and  $\lambda$ 1  
31 proteins (T3D/T1L L3S2). This virus displays a lower ISVP stability and therefore  
32 converts to ISVP\*s more readily. To identify the basis for lability of T3D/T1L L3S2, we  
33 screened for hyper-stable mutants of T3D/T1L L3S2 and identified three point mutations  
34 in  $\mu$ 1 that stabilize ISVPs. Two of these mutations are located in the C-terminal  $\phi$  region  
35 of  $\mu$ 1, which has not previously been implicated in controlling ISVP stability.  
36 Independent from compromised ISVP stability, we also found that T3D/T1L L3S2  
37 launches replication more efficiently and produces higher yields in infected cells. In  
38 addition to identifying a new role for the core proteins in disassembly events, these data  
39 highlight that core proteins may influence multiple stages of infection.

## 40 **IMPORTANCE**

41 Protein shells of viruses (capsids) have evolved to undergo specific changes to ensure  
42 the timely delivery of genetic material to host cells. The 2-layer capsid of reovirus

43 provides a model system to study the interactions between capsid proteins and the  
44 changes they undergo during entry. We tested a virus in which the core proteins were  
45 derived from a different strain than the outer capsid. We found that this mismatched  
46 virus was less stable and completed conformational changes required for entry  
47 prematurely. Capsid stability was restored by introduction of specific changes to the  
48 outer capsid, indicating that an optimal fit between inner and outer shells maintains  
49 capsid function. Separate from this property, mismatch between these protein layers  
50 also impacted the capacity of virus to initiate infection and produce progeny. This study  
51 reveals new insights into the roles of capsid proteins and their multiple functions during  
52 viral replication.

53

54

## 55 INTRODUCTION

56 In order to successfully launch replication, a virus must protect, transport and  
57 deliver its genome into the host cell. The viral capsid is a complex mechanical container  
58 with the primary function of assembling around the viral genome in one host cell, exiting  
59 that host cell and releasing the genome in another host cell. Therefore, the capsid has  
60 two demands that appear to be in direct conflict with one another. It must be stable  
61 enough to protect and transport the viral genome, but it also must be dynamic, poised to  
62 react to the right environment at the right time to perform functions during entry and to  
63 allow for replication of the genome. Viruses have evolved capsid proteins that are  
64 capable of these dynamic mechanical interactions in a number of diverse and  
65 fascinating ways. While some capsids are made up of only a single type of capsid  
66 protein, others have more complex combinations of proteins. One family of viruses,  
67 *Reoviridae*, have double or even triple layered capsids.

68 The *Reoviridae* family of viruses is made up of non-enveloped virions with  
69 capsids that are composed of 1 to 3 concentric protein shells that surround 9 to 12 ds  
70 RNA genome segments (1–3). While the outer layers of the multilayered capsids are  
71 proteolytically processed and undergo conformational changes during entry, the  
72 innermost capsid or core which contains the genome, remains intact throughout the  
73 remainder of replication (4). The core is a complex molecular machine that is capable of  
74 producing fully capped and functional RNA transcripts for translation by the host  
75 machinery (5, 6). The capsid proteins must, therefore, be capable of multiple functions  
76 in addition to their protective and structural roles. The outer capsid proteins must be  
77 poised to undergo the conformational changes required to release the cores and allow



78 them to be transcriptionally active. While studies of mammalian reovirus have provided  
79 many insights into how outer capsid proteins regulate and mediate entry events that  
80 lead to these conformational changes, the role of the core proteins in cell entry events  
81 remains unclear.

82 The capsids of mammalian reovirus are made up of two concentric protein shells,  
83 the core and the outer capsid (4). The outer capsid is primarily made up of  $\mu 1$ - $\sigma 3$   
84 heterohexamers (7) (Fig 1). These surround the core which is comprised of  $\lambda 1$   
85 decamers held in place by  $\sigma 2$  (8). Turrets, made up of  $\lambda 2$  pentamers, protrude from the  
86 core at the five-fold axis of symmetry. The  $\sigma 1$  attachment protein forms trimers that are  
87 anchored in the  $\lambda 2$  turret (8, 9). After entry,  $\sigma 3$  is proteolytically degraded within the  
88 endosome and  $\mu 1$  is cleaved into  $\mu 1\delta$  and  $\mu 1\phi$  fragments (10, 11). These  $\mu 1$  fragments  
89 remain particle associated at this stage and the particle is referred to as an infectious  
90 subviral particle or ISVP (12–14). Further conformational changes within the  
91 endosome result in cleavage of  $\mu 1\delta$  to form  $\mu 1N$  and  $\delta$  (15, 16). These particles are no  
92 longer infectious and are referred to as ISVP\*. Release of  $\mu 1$  peptides ( $\mu 1N$  and  $\phi$ )  
93 results in penetration of the endosomal membrane and the deposition of the  
94 transcriptionally active cores into the cytoplasm (13, 17, 18).

95 Previous work in identifying interactions and proteins involved in reovirus  
96 disassembly and cell entry have focused on the outer capsid proteins. Here, we focused  
97 on the structural functions of the core proteins  $\lambda 1$  and  $\sigma 2$ . We characterized a  
98 reassortant virus containing the  $\lambda 1$  encoding gene segment L3 and the  $\sigma 2$  encoding  
99 gene segment S2 (T3D/T1L L3S2). We found that this new virus displays a higher  
100 ISVP-to-ISVP\* conversion efficiency or lower ISVP stability. We identified three point

101 mutations in  $\mu 1$  that increase the stability of T3D/T1L L3S2. Two of these mutations are  
102 located in the  $\phi$  region of  $\mu 1$ , which has not previously been implicated in maintaining  
103 ISVP stability or controlling ISVP-to-ISVP\* conversion. Additionally, this reassortant  
104 virus has increased growth resulting from higher transcription levels and, subsequently,  
105 higher protein production. This role does not appear to be related to the enhanced  
106 ISVP-to-ISVP\* conversion of this virus. These results provide insights into  
107 understanding the structural functions of the core proteins and how their interactions  
108 may influence disassembly and early replication steps during infection.

109

## 110 RESULTS

111 **ISVP to ISVP\* conversion efficiency of T3D is altered by the T1L core proteins  $\lambda 1$**   
112 **and  $\sigma 2$ .** Single gene reassortants between prototype reovirus strains T1L and T3D,  
113 which contain mismatches between outer capsid proteins, display altered capsid  
114 stability and efficiency of disassembly intermediate formation (19–21). To determine  
115 whether the core proteins  $\lambda 1$  and  $\sigma 2$  play a role in ISVP-to-ISVP\* conversion efficiency,  
116 we characterized the properties of T3D/T1L L3S2. This virus contains the  $\lambda 1$ -encoding  
117 gene segment L3 and the  $\sigma 2$ -encoding gene segment S2 from T1L in an otherwise T3D  
118 genetic background. The resulting virus therefore contains major core proteins that do  
119 not match the outer capsid. The  $\lambda 1$  protein from T3D and T1L are 99.3% identical (9  
120 amino acid differences out of 1,275) and the  $\sigma 2$  proteins are 98.8% identical (5 amino  
121 acid differences out of 418) (22–24). While  $\sigma 2$  interacts with the outer capsid  $\mu 1$  trimer,  
122  $\lambda 1$  is not known to interact with any outer capsid proteins (25).

123 To test overall virion stability, we incubated T3D and T3D/T1L L3S2 over a series  
124 of elevated temperatures and tested the protease stability of the major viral capsid  
125 proteins. Such an approach has been used previously to test stability of virions and viral  
126 entry intermediates (19). Based on the similarity in their protease sensitivity profiles, we  
127 think that virions of T3D/T1L L3S2 do not display significant changes in stability in  
128 comparison to the parent strain, T3D (Fig 2A). To determine if the mismatches in this  
129 reassortant virus alter stability of ISVPs or efficiency of ISVP-to-ISVP\* conversion, we  
130 generated ISVPs of T3D and T3D/T1L L3S2 and incubated them over a gradient of  
131 increasing temperatures. ISVP\* conversion was determined as a measure of trypsin  
132 sensitivity of the  $\mu 1 \delta$  fragment (26). In comparison to the parent strain T3D, T3D/T1L  
133 L3 ISVPs have significantly reduced stability or enhanced ISVP-to-ISVP\* conversion *in*  
134 *vitro* (Fig 2B).

135 Conversion to ISVP\* results in loss of outer capsid proteins that are essential for  
136 entry (27, 28). As a consequence, ISVPs that are heated to temperatures that result in  
137 ISVP\* conversion have significantly reduced titers. Measuring thermal stability of ISVP  
138 infectivity, therefore, is an alternate method to evaluate the efficiency of ISVP\*  
139 formation. T3D/T1L L3S2 and T3D ISVPs were heated to 40°C and loss of infectivity  
140 was measured by plaque assay. Consistent with previous work (20), at 40°C, most of  
141 the T3D ISVPs did not convert to ISVP\* and the change in titer was minimal (Fig 2C).  
142 However, heating T3D/T1L L3S2 ISVPs to 40°C resulted in ISVP\* conversion and a  
143 significant loss in infectivity (Fig 2C). These data indicate that the reovirus core proteins  
144 play a role in stability of the ISVP, a function previously not attributed to the major core  
145 proteins  $\lambda 1$  and  $\sigma 2$ .

146 **Enhanced ISVP-to-ISVP\* conversion is not due to interactions with RNA.** In  
147 addition to its structural functions,  $\lambda 1$  plays a variety of other roles during infection. One  
148 of those functions involves interaction with RNA (29, 30). If  $\lambda 1$ -RNA interactions affect  
149 stability of the particles, it may explain why viruses with different core proteins and,  
150 consequently, the potential for different RNA interaction properties, may have altered  
151 stability. To rule out this possibility, we tested the ISVP-to-ISVP\* conversion efficiency  
152 of genome-containing particles in comparison to genome-deficient particles of T3D. This  
153 comparison would allow us to uncover the contribution of viral genomic RNA to ISVP  
154 stability. ISVP-to-ISVP\* conversion was again determined as a measure of trypsin  
155 sensitivity of  $\mu 1 \delta$ . Stability of ISVPs of genome-containing particles and genome-  
156 deficient particles was not significantly different which suggests that  $\lambda 1$ -RNA  
157 interactions do not affect ISVP-to-ISVP\* conversion. Thus, the ISVP-to-ISVP\*  
158 phenotype of T3D/T1L L3S2 is likely not related to differences in RNA interactions (Fig  
159 3).

160 **Isolation of heat resistant mutants in T3D/T1L L3S2.** Because ISVP particles that  
161 have converted to ISVP\* are less infectious, it is possible to select for and isolate  
162 variants with mutations that render ISVPs more stable and thus still retain infectivity  
163 after exposure to heat (28, 31, 32). Mapping such mutations could reveal key  
164 interactions between viral structural proteins that contribute to maintaining ISVP  
165 stability. In order to better understand the basis for the lower stability of this reassortant,  
166 we sought to identify such mutations in T3D/T1L L3S2 (Fig 4A). ISVPs of T3D/T1L  
167 L3S2 were heated to 40°C (a temperature at which they display significantly lower  
168 infectivity than that of similarly treated wild-type ISVPs derived from T3D) and subjected

169 to plaque assay. Resulting plaques were isolated as potential heat resistant mutants. To  
170 confirm the heat resistance of these isolates, ISVPs of each isolate were again  
171 incubated at 40°C and loss of infectivity in comparison to ISVPs incubated at 4°C was  
172 determined by plaque assay. Of the 20 isolates tested, 7 were determined to have little  
173 to no loss in infectivity. These isolates were considered to be heat resistant (HR) (Fig  
174 4B). For each of these 7 isolates, genome segments encoding  $\lambda 1$ ,  $\sigma 2$ , and  $\mu 1$  (L3, S2  
175 and M2 respectively) were sequenced. We reasoned that these genome segments will  
176 bear mutations because T3D/T1L L3S2 differs from T3D in the properties of  $\lambda 1$  and  $\sigma 2$ ,  
177 and because  $\mu 1$  has been previously implicated in controlling stability of ISVPs (28, 33–  
178 35). None of the isolates contained mutations in L3 or S2. Four isolates were identified  
179 with mutations in  $\mu 1$ . HR16 had a mutation at amino acid 459 (lysine to glutamic acid)  
180 which is located in the  $\delta$  fragment of  $\mu 1$ . HR2, HR15 and HR17 had mutations in the  $\phi$   
181 fragment of  $\mu 1$ . The mutation in HR 15 was at amino acid 607 (proline to glutamine) and  
182 HR2 and HR17 had the same mutation at amino acid 615 (alanine to threonine) (Fig 4  
183 C, D, E). Notably, the K459E mutation has been previously identified as a stabilizing  
184 mutation (31). However, mutations in  $\mu 1$   $\phi$  that contribute to ISVP stability or ISVP-to-  
185 ISVP\* conversion efficiency have not been previously identified.

186 **Mutations in  $\mu 1$  stabilize T3D/T1L L3S2 ISVPs.** Because we did not sequence the  
187 entire genome of HR viruses, it remains possible that mutations in genome segments  
188 other than L3, S2 and M2 influence the thermal stability of ISVPs generated from the  
189 second-site revertants. To evaluate the stabilizing effect of the identified mutations on  
190 T3D/T1L L3S2 ISVPs, each mutation was introduced individually into a T3D/T1L L3S2  
191 background. Each new mutant virus was tested for ISVP-to-ISVP\* conversion efficiency.

192 ISVPs of each virus were generated and incubated over a gradient of temperatures.  
193 ISVP\* conversion was determined as a measure of trypsin sensitivity of the  $\mu 1$   $\delta$   
194 fragment (21). In comparison to T3D/T1L L3S2, each of the ISVPs with  $\mu 1$  mutations  
195 had increased stability, suggesting that these amino acid residues in  $\mu 1$  play important  
196 roles in ISVP-to-ISVP\* conversion (Fig 5A). To verify these results, the infectivity of  
197 ISVPs of T3D/T1L L3S2 and each of the  $\mu 1$  mutants at 4°C and 40°C was compared by  
198 plaque assay. Consistent with the results seen in Fig 2C, T3D/T1L L3S2 ISVPs  
199 experience a loss of infectivity at this temperature. In contrast, introduction of  $\mu 1$   
200 changes identified in heat resistant mutants into T3D/T1L L3S2 result in ISVP particles  
201 that display greater stability (Fig 5B). These data indicate that mutations in  $\mu 1$  are  
202 sufficient to restore wild-type like ISVP-to-ISVP\* conversion efficiency and thermal  
203 stability to T3D/T1L L3S2.

204 **Mutations in  $\mu 1$  also affect ISVP-to-ISVP\* conversion in wild-type T3D.** The  $\mu 1$   
205 mutations that restored thermal stability of ISVPs and normal ISVP-to-ISVP\* conversion  
206 efficiency of T3D/T1L L3S2 are not in a position to contact proteins that make up the  
207 core (25, 36). Thus, it seems unlikely that these mutations stabilize the capsid by  
208 directly altering core-outer capsid interactions. One possibility is that the changes in  $\mu 1$   
209 simply stabilize the capsid by strengthening interactions between  $\mu 1$  monomers or  
210 between  $\mu 1$  trimers. If so, the  $\mu 1$  mutations would be expected to further stabilize ISVPs  
211 of T3D, which contains different L3 and S2 alleles. To test this idea, we also generated  
212 viruses containing one of each of the three  $\mu 1$  changes found in the HR viruses in a  
213 wild-type T3D background. As before, ISVPs of each virus were generated and  
214 incubated over a gradient of temperatures. ISVP\* conversion was again determined as

215 a measure of trypsin sensitivity of the  $\mu 1$   $\delta$  fragment. In comparison to wild-type T3D,  
216 each mutant underwent ISVP-to-ISVP\* conversion much less efficiently (Fig 6A). To  
217 verify these results, each virus was tested for loss of infectivity. ISVPs of T3D along with  
218 each mutant were heated to 49°C and loss in infectivity was measured by plaque assay.  
219 The 49°C temperature was determined empirically as the lowest temperature at which  
220 T3D ISVPs exhibit a loss in infectivity (data not shown). Consistent with the data in Fig  
221 6A, at this temperature each of the  $\mu 1$  mutants displayed no loss of infectivity when  
222 compared to wild-type T3D. These data suggest that the mutations identified in  $\mu 1$  are  
223 generally stabilizing mutations and not directly related to the effects of the mismatched  
224 core proteins.

225 **Mismatches between the core and outer capsid proteins affect viral replication**  
226 **and transcription.** To determine if the differences in the ISVP-to-ISVP\* conversion  
227 efficiency of T3D and T3D/T1L L3S2 are relevant during a viral infection, we next  
228 examined viral growth via following infection of cells at an MOI of 0.1 PFU/cell. Virus  
229 titer at 24 h following infection was determined by plaque assay and viral yield was  
230 calculated as an increase in titer from 0 h post infection (which measured virus  
231 adsorbed to cells at the start of infection). We observed that infection with T3D/T1L  
232 L3S2 resulted in an increased yield in comparison to T3D (Fig 7A). To determine if this  
233 growth phenotype correlates with increased ISVP-to-ISVP\* conversion efficiency, we  
234 tested the impact of introducing a representative  $\mu 1$  mutation, A615T in these viruses.  
235 While growth of T3D was significantly higher than growth of T3D M2 A615T, growth of  
236 T3D/T1L L3S2 was not significantly different from T3D/T1L L3S2 M2A615T (Fig 7A). As  
237 the M2 A615T mutation in T3D/T1L L3S2 restores the stability of its ISVPs, these data

238 indicate that differences in replication efficiency of T3D and T3D/T1L L3S2 is not a  
239 consequence of the capacity of the reassortant virus to more easily convert to ISVP\*.  
240 These data also suggest that T1L derived L3 and S2 genome segments can influence  
241 the properties of T3D in multiple independent ways.

242         The higher replication potential of T3D/T1L L3S2 could be related to the capacity  
243 of this virus to produce more viral gene products with faster kinetics or to a greater  
244 extent. To test this idea, we next examined viral gene expression early during infection  
245 using immunoblots. Cells were infected with ISVPs at an equal MOI and harvested at 0  
246 or 10h post infection. Expression of the  $\mu$ 1 protein was assessed as a representative.  
247 While expression of  $\mu$ 1 was visible at 10 h post infection in all samples, T3D/T1L L3S2  
248 displayed significantly higher protein expression than WT T3D (Fig 7B). To test the  
249 impact of ISVP-to-ISVP\* conversion phenotypes on protein expression, we also  
250 examined T3D M2 A615T and T3D/T1L L3S2 M2 A615T. While both viruses displayed  
251 lower protein levels than T3D/T1L L3S2, the mutant in the T3D background had  
252 significantly lower  $\mu$ 1 expression than the mutant in the T3D/T1L L3S2 suggesting that  
253 the ISVP-to-ISVP\* conversion phenotype alone is not responsible for the increase in  
254 protein expression. To determine whether the greater level of viral protein expression is  
255 a consequence of a higher level of viral mRNA, we measured transcription of viral S1  
256 mRNA early during infection using RT-qPCR. Cells were infected with ISVPs at an  
257 equal MOI and harvested at 6 hours post infection. At this timepoint, T3D/T1L L3S2  
258 showed significantly greater reovirus S1 transcripts compared to T3D, indicating that the  
259 increase in protein production is likely due to enhanced transcription by the reassortant



260 virus (Fig 7C). These data indicate that swapping core proteins between T1L and T3D  
261 in a reassortant virus also influence post-entry viral replication events.

262

## 263 **DISCUSSION**

264 To test the role of the inner core proteins on disassembly and early entry events  
265 we generated a reassortant virus with major core proteins from T1L and all other  
266 proteins (including the outer capsid) from T3D (T3D/T1L L3S2). T3D/T1L L3S2  
267 undergoes ISVP-to-ISVP\* conversion much more efficiently. We identified mutations in  
268  $\mu 1$  that stabilize ISVPs. T3D/T1L L3S2 also demonstrated increased growth kinetics  
269 compared to the parental T3D strain. Surprisingly, the more efficient growth of T3D/T1L  
270 L3S2 was not related to its capacity to undergo more efficient ISVP-to-ISVP\* transition.  
271 Instead, increased growth of T3D/T1L L3S2 relates to more rapid protein and mRNA  
272 production early in infection. These data suggest that alteration in properties of core  
273 proteins can impact the function of the outer capsid proteins in cell entry. Additionally,  
274 properties of core proteins can also influence the enzymatic functions of the capsid that  
275 are required to establish efficient infection of host cells.

276 The reovirus core is a T=1 icosahedron and it is surrounded by the outer capsid  
277 (T=13). The outer capsid is made up of 200 heterohexamers of  $\mu 1$  and  $\sigma 3$  proteins that  
278 cover the core (25, 36). It is penetrated by  $\lambda 2$  pentameric turrets at each five-fold axis of  
279 symmetry. Trimers of the  $\sigma 1$  attachment protein are situated inside these  $\lambda 2$  turrets (8,  
280 25). The core is made up of 120 copies of  $\lambda 1$  arranged in asymmetric pairs of  
281 pentamers to form decamers. Twelve such decamers make up the core. The  $\sigma 2$  protein

282 clamps onto  $\lambda 1$  at 3 different sites within an asymmetric unit resulting in 150 copies of  
283  $\sigma 2$  stabilizing the core shell (8). At each five-fold axis of symmetry, channels penetrate  
284 the shell via the  $\lambda 2$  pentameric turrets. It is at each of these channels that the  $\lambda 3$   
285 polymerase interacts with  $\lambda 1$  and is thought to interact with the polymerase co-factor  $\mu 2$   
286 (5, 37, 38). There are no known contacts between  $\lambda 1$  and the outer capsid. A majority of  
287 contacts between the core and the outer capsid occur between  $\mu 1$  and  $\sigma 2$ . These  
288 interactions involve the bottom surface of  $\mu 1$  and the top surface of  $\sigma 2$  (25). The “hub  
289 and spoke” structure formed by the C-terminal 33 residues of  $\mu 1$  which is thought to be  
290 important for stabilizing the  $\mu 1$  lattice also makes contact with  $\lambda 2$  and/or  $\sigma 2$  (25). This  
291 interaction is thought to be stabilized in part by the  $\mu 1$  residues 51-62 which form  
292 flexible loops (25). It is possible that the polymorphic differences between  $\sigma 2$  proteins of  
293 T1L and T3D influence interaction with  $\mu 1$  sufficiently enough such that disassembly is  
294 altered.  $\lambda 1$  can also impact interaction of the core with  $\mu 1$ , thereby changing  
295 disassembly. However, because  $\mu 1$  does not contact  $\lambda 1$ , this effect would occur  
296 indirectly if the structure or conformation of  $\lambda 2$  or  $\sigma 2$ , two proteins that do interact with  
297  $\mu 1$ , is altered due to differences in  $\lambda 1$  residues. The relative contribution of differences in  
298 properties of  $\sigma 2$  and  $\lambda 1$  and the potential subtle differences in structure remain the focus  
299 of our ongoing work.

300 Differences in entry efficiency between different serotypes and laboratory strains  
301 of reovirus along with genetic approaches have been used to study how conformational  
302 changes and cleavage events required for entry are regulated. Panels of reassortant  
303 viruses link differences in ISVP-to-ISVP\* conversion to  $\mu 1$  (28). The autocatalytic  
304 cleavage of  $\mu 1$  and efficiency of ISVP\* formation have both been linked to distinct

305 portions of the  $\delta$  fragment of  $\mu 1$  (33). Multiple other studies have linked efficiency of  
306 entry related disassembly events to the  $\delta$  fragment of  $\mu 1$  (31, 33, 35, 36, 39). The  $\mu 1N$   
307 fragment is released from the particle during ISVP\* conversion and the released  
308 fragment is thought to function in a positive feedback loop to further drive ISVP\*  
309 conversion (40). The ISVP\* promoting activity of  $\mu 1N$  is most efficient in presence of  
310 membranes, likely because membrane associated  $\mu 1N$  recruits ISVP-like particles (41,  
311 42). Cleavage of  $\phi$ , which is required for its release from particles during ISVP\*  
312 conversion is also required for efficient interaction of ISVPs with membranes (42).  
313 However, precisely how  $\phi$  functions in this step is not known. Here, we have identified  
314 two mutations in the  $\phi$  fragment of  $\mu 1$  that influence ISVP-to-ISVP\* conversion. These  
315 mutations are the first indication that the  $\phi$  fragment may also be involved in ISVP-to-  
316 ISVP\* conversion efficiency. Because our ISVP-to-ISVP\* reactions were performed in  
317 absence of membranes, the mutations are unlikely to influence ISVP-to-ISVP\*  
318 conversion by affecting particle-membrane interaction. Thus, the precise mechanism by  
319 which the identified  $\phi$  residues influence ISVP\* remains unclear. While the majority of  
320  $\mu 1$ - $\sigma 3$  interactions occur in the jelly-roll domains (residues 306-514) of  $\mu 1$ , both of the  
321 mutations identified are in a region proposed to form the cradle for the base of  $\sigma 3$  (36)  
322 This region has not been shown to interact with any core proteins or with neighboring  $\mu 1$   
323 monomers (36). Therefore, it is unlikely that these mutations stabilize ISVPs by  
324 strengthening inter- or intra-  $\mu 1$  trimer interactions or by interacting with core proteins.  
325 The identified mutations are in a region of  $\mu 1$  that may unfold in order to accommodate  
326  $\mu 1N$  release which is a necessary step of ISVP-to-ISVP\* conversion (25, 36). Thus, one  
327 likely explanation is that  $\phi$  properties affect the release of  $\mu 1N$ .

328           The L3 gene segment encoded  $\lambda 1$  protein is thought of first as a structural  
329 protein that makes up the inner core of reovirus. However, as is the case with most  
330 viruses, proteins are capable of playing multiple roles during infection. In addition to its  
331 structural roles  $\lambda 1$  has RNA helicase activity, phosphohydrolase activity and is known to  
332 interact with RNA (30). The role of each of these functions during infection is currently  
333 unknown. The polymerase  $\lambda 3$  interacts with  $\lambda 1$  on the inside of the shell at each five-  
334 fold axis (8, 43). While the position of the transcription cofactor protein  $\mu 2$  within the  
335 capsid is not known, it is possible that it also interacts with  $\lambda 1$ . Thus, the interaction  
336 of  $\lambda 1$  with these encapsidated enzymes could alter viral transcription efficiency.  
337 Reovirus serotypes T1L and T3D replicate with different efficiency in some cell lines,  
338 with T1L replicating to a higher extent and with faster kinetics (44). Reassortant  
339 analyses have partially linked this phenotype to the T1L derived  $\lambda 1$ -encoding L3 gene  
340 segment (44). Our studies indicate that the enhanced infection efficiency of T3D/T1L  
341 L3S2 is not related to its greater propensity for ISVP-to-ISVP\* transition. Instead, we  
342 propose that enhanced efficiency of infection is a result of differences in the activity of  
343  $\lambda 1$  itself or its impact on the activity of the transcriptional machinery comprised of  $\lambda 3$  and  
344  $\mu 2$ . While the role of  $\sigma 2$  as a structural protein is well established, additional roles in  
345 replication have not been confidently identified. It has weak interactions with dsRNA and  
346 reassortant studies have linked  $\sigma 2$  with increased induction and sensitivity to interferon  
347 in some cell types (45, 46). Additional studies are needed with monoreassortants  
348 bearing only S2 and L3 gene segments in the T3D background to precisely ascertain  
349 the basis for the enhanced replicative efficiency of T3D/T1L L3S2.

350           Recent studies from our laboratory have revealed that reassortant viruses display  
351 phenotypes that are unexpected and extend beyond the known function of the protein.  
352 First, we found that, even though the primary function of the M2 encoded protein  $\mu 1$  is in  
353 membrane penetration, an M2 reassortant virus displays greater attachment to host  
354 cells (47). Second, we found that though the S1 encoded  $\sigma 1$  protein is the attachment  
355 factor, an S1 reassortant impacts the stability of the  $\mu 1$  layer with which it makes no  
356 interactions (20). Our current study presented here reveals that core proteins,  
357 previously only thought to have a structural role in packaging the genomic material,  
358 influence cell entry events regulated by the outer capsid. Until the advent of reverse  
359 genetics, reassortant analyses have been used as the main strategy to assign function  
360 to proteins of segmented viruses. This approach has also been useful to determine the  
361 genetic basis of viral disease. While this approach has been invaluable, we think our  
362 work suggests that the structure-function explanation of some phenotypes reported for  
363 reovirus and possibly other members of the *Reoviridae* family may be more complicated  
364 than previously appreciated.

365

## 366 **MATERIALS AND METHODS**

367 **Cells and viruses.** Spinner adapted murine L929 (L) cells were grown at 37°C in  
368 Joklik's minimal essential medium (Lonza) supplemented with 5% fetal bovine serum  
369 (FBS) (Life Technologies), 2 mM L-glutamine (Invitrogen), 100 U/ml penicillin  
370 (Invitrogen), 100  $\mu$ g/ml streptomycin (Invitrogen), and 25 ng/ml amphotericin B (Sigma-  
371 Aldrich). All virus strains used in this study were derived from reovirus type 3 Dearing  
372 (T3D) and reovirus type 1 Lang (T1L) and were generated by plasmid-based reverse

373 genetics (48). Mutations within the T3D M2 gene were generated by QuikChange site-  
374 directed mutagenesis (Agilent Technologies). Primer sequences are available upon  
375 request.

376 **Virus propagation and purification.** All wild-type and mutant viruses used in this study  
377 were propagated and purified as previously described (49, 50). Briefly, plaques isolated  
378 from plasmid based reverse genetics were propagated successively in T-25, T75 and T-  
379 175 flasks to generate P0, P1 and P2 virus stocks respectively. To generate purified  
380 virus, L cells infected with P2 reovirus stocks were lysed by sonication. Virus particles  
381 were extracted from the lysates using Vertrel-XF specialty fluid (Dupont) (51). The  
382 extracted particles were layered onto 1.2- to 1.4-g/cm<sup>3</sup> CsCl step gradients. The  
383 gradients were then centrifuged at 187,000 × *g* for 4 h at 4°C. Bands corresponding to  
384 purified virus particles (~1.36 g/cm<sup>3</sup>) (52) were isolated and dialyzed into virus storage  
385 buffer (10 mM Tris, pH 7.4, 15 mM MgCl<sub>2</sub>, and 150 mM NaCl). Following dialysis, the  
386 particle concentration was determined by measuring the optical density of the purified  
387 virus stocks at 260 nm (OD<sub>260</sub>) (1 unit at OD<sub>260</sub> is equal to 2.1 × 10<sup>12</sup> particles/ml)

388 **Generation of ISVPs.** Purified virions of the indicated virus strains (2 × 10<sup>12</sup> particles/ml  
389 or 4 × 10<sup>12</sup> particles/ml) were digested with 200 µg/ml TLCK (*N*α-*p*-tosyl-L-lysine  
390 chloromethyl ketone)-treated chymotrypsin (Worthington Biochemical) in a total volume  
391 of 100 µl for 1 hour at 32°C. After 1 h, the reaction mixtures were incubated for 20 min  
392 on ice and quenched by the addition of 1 mM phenylmethylsulfonyl fluoride (Sigma-  
393 Aldrich). The generation of ISVPs was confirmed by SDS-PAGE and Coomassie  
394 brilliant blue staining.

395 **Analysis of ISVP-ISVP\* conversion.** ISVPs ( $2 \times 10^{12}$  particles/ml) of the indicated viral  
396 strains were divided into aliquots of equivalent volumes and heated at the indicated  
397 temperatures for 20 min. The reaction mixtures were cooled on ice and then digested  
398 with 0.10 mg/ml trypsin (Sigma-Aldrich) for 30 min on ice. Following addition of the  
399 SDS-PAGE loading dye, the samples subjected to SDS-PAGE analysis. For analysis by  
400 quantitative infectivity assay, P2 stocks or purified virus stocks of the indicated viruses  
401 were diluted 1:10 in virion storage buffer (10 mM Tris, pH 7.4, 15 mM MgCl<sub>2</sub>, and 150  
402 mM NaCl). 200µg/mL TLCK (*N*α-*p*-tosyl-L-lysine chloromethyl ketone)-treated  
403 chymotrypsin (Worthington Biochemical) was added to each sample. Samples were  
404 heated to 37°C for 30 min. The reaction was quenched by the addition of 1 mM  
405 phenylmethylsulfonyl fluoride (Sigma-Aldrich) and cooled on ice for 10 min. The  
406 reactions were divided in equivalent volumes and incubated at 4°C or 40°C for 20 min.  
407 Reactions were used to initiate infection of L929 cells and infectivity was determined by  
408 plaque assay. The change in infectivity at a given temperature (*T*) was calculated using  
409 the following formula:  $\log_{10}(\text{PFU/ml})_T - \log_{10}(\text{PFU/ml})_{4^\circ\text{C}}$ .

410 **Analysis of virion stability.** Virions ( $2 \times 10^{12}$  particles/ml) of the indicated viral strains  
411 were divided into aliquots of equivalent volumes and heated at the indicated  
412 temperatures for 20 min. The reaction mixtures were cooled on ice and then digested  
413 with 0.10 mg/ml trypsin (Sigma-Aldrich) for 30 min on ice. Following addition of SDS  
414 loading dye, the samples were subjected to analysis by SDS-PAGE.

415 **Isolation and verification of heat resistant (HR) mutants.** ISVPs of purified T3D/T1L  
416 L3S2 were generated and subsequently heated to 40°C for 20 min. Resulting reactions  
417 were diluted in phosphate-buffered saline (PBS) supplemented with 2 mM MgCl<sub>2</sub> and

418 subjected to plaque assay. Heat resistant mutants were selected by plaque purification  
419 and propagated in L cells to obtain P0 viral stocks. P0 stocks were diluted 1:10 in virion  
420 storage buffer (10 mM Tris, pH 7.4, 15 mM MgCl<sub>2</sub>, and 150 mM NaCl). 200µg/mL TLCK  
421 (*N*α-*p*-tosyl-L-lysine chloromethyl ketone)-treated chymotrypsin (Worthington  
422 Biochemical, Lakewood, NJ) was added to each sample. Samples were heated to 37°C  
423 for 30 min. The reaction was quenched by the addition of 1 mM phenylmethylsulfonyl  
424 fluoride (Sigma-Aldrich) and cooled on ice for 10 min. The reactions were divided in  
425 equivalent volumes and incubated at 4°C or 40°C for 20 min. Reactions were used to  
426 initiate infection of L929 cells and infectivity was determined by plaque assay. The  
427 change in infectivity at a given temperature (*T*) was calculated using the following  
428 formula:  $\log_{10}(\text{PFU/ml})_T - \log_{10}(\text{PFU/ml})_{4^\circ\text{C}}$ .

429 **Plaque titration.** Plaque assays were conducted in spinner-adapted L929 cells plated  
430 in 6-well plates (Greiner Bio-One). Cells were adsorbed with dilutions of virus in  
431 phosphate-buffered saline (PBS). Cells were overlaid with a molten mixture comprised  
432 of 1× medium 199 and 1% Bacto agar supplemented with 10 µg/ml chymotrypsin. Five  
433 days following infection, the monolayers were fixed by addition of 4% formaldehyde  
434 solution in PBS and incubated overnight. The agar overlay was peeled off, and the  
435 monolayers were stained with 1% crystal violet stain in 5% ethanol for 5 h at room  
436 temperature. The monolayers were washed with water. Virus titer was quantified by  
437 manual counting of plaques.

438 **Analysis of protein levels by immunoblotting.** The samples were whole-cell lysates  
439 of infected cells prepared using radioimmunoprecipitation assay (RIPA) lysis buffer (50  
440 mM NaCl, 1 mM EDTA at pH 8, 50 mM Tris at pH 7.5, 1% Triton X-100, 1% sodium



441 deoxycholate, 0.1% SDS) supplemented with protease inhibitor cocktail (Roche) and  
442 500  $\mu$ M PMSF, and they were resolved on 10% SDS-PAGE gels and transferred to  
443 nitrocellulose membranes. For immunoblotting using polyclonal rabbit antireovirus  
444 serum, the membranes were blocked with 5% milk in Tris-buffered saline (TBS) at room  
445 temperature for 1 h. Following blocking, rabbit anti-reovirus serum (1:1,000) or anti-  
446 PSTAIR was incubated with the membrane in appropriate blocking buffer at room  
447 temperature for 1 h. The membranes were washed with TBS supplemented with 0.1%  
448 Tween 20 (TBS-T) twice for 15 min and then incubated with Alexa Fluor-conjugated  
449 anti-rabbit IgG or anti-mouse IgG in blocking buffer. Following three washes,  
450 membranes were scanned using an Odyssey infrared imager (LI-COR), and intensities  
451 of bands were quantified using Image Studio Lite software (LI-COR).

452 **Analysis of mRNA levels by RT-qPCR.** RNA was extracted from infected cells, at  
453 various times after infection, using a total RNA minikit (Bio-Rad). For RT-qPCR, 0.5 to 2  $\mu$ g  
454 of RNA was reverse transcribed with the high-capacity cDNA RT kit (Applied Biosystems),  
455 using random hexamers for amplification of cellular and viral genes. Undiluted cDNA was  
456 subjected to PCR using SYBR Select Master Mix (Applied Biosystems) and primers specific  
457 for T3D S1 and GAPDH. Fold increases in gene expression with respect to control samples  
458 (indicated in figure legend) were measured using the  $\Delta\Delta C_T$  method (53). Calculations for  
459 determining  $\Delta\Delta C_T$  values and relative levels of gene expression were performed as follows:

460 fold increase in viral gene expression =  $2_{[-(\Delta\Delta C_T)]}$

461 **Statistical analyses.** The reported values represent the means of three independent  
462 biological replicates. The error bars indicate standard deviations (SD). *P* values were  
463 calculated using Student's *t* test (two-tailed; unequal variance assumed).

464 **Modeling.** Molecular graphics were created and analysis were performed with the  
465 UCSF Chimera package (54).

466

467

## 468 **FIGURE LEGENDS**

469 **Figure 1.** Schematic representation of reovirus capsid proteins.

470 **Figure 2.** T3D/T1L L3S2 exhibits increased efficiency of ISVP to ISVP\* conversion *in*  
471 *vitro*. (A) T3D and T3D/T1L L3S2 virions ( $2 \times 10^{12}$  particles/ml) were divided into aliquots  
472 of equal volume and incubated at either 4°C or over a range of temperatures (65-85°C)  
473 for 5 min. The reactions were chilled on ice and digested with 0.10mg/ml trypsin for 30  
474 min. Following addition of loading dye, the samples were subjected to SDS-PAGE  
475 analysis. The positions of major capsid proteins are shown.  $\mu 1$  runs as  $\mu 1C$  (15). (B)  
476 ISVPs ( $2 \times 10^{11}$  particles/ml) of T3D or T3D/T1L L3S2 were divided into aliquots of  
477 equivalent volume and incubated either at 4°C or over a range of temperatures (22-  
478 42°C) for 20 min. The reactions were chilled on ice and digested with 0.10 mg/ml trypsin  
479 for 30 min. Following addition of loading dye the samples were subjected to SDS-PAGE  
480 analysis. The gels shown are representative of at least 3 independent experiments. The  
481 position of major capsid proteins is shown.  $\mu 1$  runs as  $\mu 1C$ . (C) ISVPs generated from  
482 P2 stocks of the indicated virus strain were divided into aliquots of equivalent volume  
483 and incubated at either 4°C or 40°C for 20 min. Reactions were then diluted in PBS and  
484 subjected to plaque assay. The data are plotted as mean loss of infectivity for three

485 independent samples in comparison to samples incubated at 4°C. Error bars indicate  
486 SD. \*, P<0.05 as determined by student's t-test in comparison to T3D.

487 **Figure 3.** Increased ISVP to ISVP\* efficiency in T3D/T1L L3S2 is not due to altered  
488 interactions with viral RNA. ISVPs ( $2 \times 10^{11}$  particles/ml) derived from genome-containing  
489 or genome-deficient particles of strain T3D were divided into aliquots of equivalent  
490 volume and incubated at either 4°C or over a range of temperatures (22-40°C) for 20  
491 min. The reactions were chilled on ice and digested with 0.10 mg/ml trypsin for 30 min.  
492 Following addition of loading dye the samples were subjected to SDS-PAGE analysis.  
493 The position of major capsid proteins is shown.  $\mu 1$  runs as  $\mu 1C$ .

494 **Figure 4.** Selection of viruses with mutations that confer stability to T3D/T1L L3S2  
495 ISVPs. (A) Diagram depicting the process for selecting for mutants with reduced ISVP-  
496 ISVP\* conversion efficiency of T3D/T1L L3S2. ISVPs of T3D/T1L L3S2 were incubated  
497 at 40°C for 20 min. Reactions were then diluted in PBS and subjected to plaque assay.  
498 Viruses from resulting plaques were isolated and propagated to generate P0 stocks.  
499 Heat resistance of these putative heat resistant (HR) plaque isolates was confirmed by  
500 measuring the thermal stability of ISVPs incubated at 4°C or 40°C using a plaque  
501 assay. Mutants that were confirmed as heat resistant were sequenced. (B) ISVPs  
502 generated from P0 stocks were incubated at either 4°C or 40°C for 20 min. Reactions  
503 were then diluted in PBS and subjected to plaque assay. ND, Not detectable. (C, D) Top  
504 (left) and side (right) views of  $\mu 1$  trimer (C) and monomer (D) are shown. Position of  
505 mutations identified in HR viruses are shown in green.  $\mu 1$  cleavage fragments are  
506 colored as indicated (E) with one  $\mu 1$  monomer shown with darker colors.

507 **Figure 5.** Mutations in  $\mu 1$  restore stability. (A) ISVPs ( $2 \times 10^{11}$  particles/ml) of T3D/T1L  
508 L3S2 with the indicated M2 mutations were divided into aliquots of equivalent volume  
509 and incubated at either 4°C or over a range of temperatures (22-42°C) for 20 min. The  
510 reactions were chilled on ice and digested with 0.10 mg/ml trypsin for 30 min. Following  
511 addition of loading dye the samples were subjected to SDS-PAGE analysis. The gels  
512 shown are representative of at least 3 independent experiments. The position of major  
513 capsid proteins is shown.  $\mu 1$  runs as  $\mu 1C$ . (B) ISVPs generated from P2 stocks of the  
514 indicated virus strain were divided into aliquots of equivalent volume and incubated at  
515 either 4°C or 40°C for 20 min. Reactions were then diluted in PBS and subjected to  
516 plaque assay. The data are plotted as mean loss of infectivity for three independent  
517 samples in comparison to samples incubated at 4°C. Error bars indicate SD. \*\*,  $P < 0.01$ ,  
518 \*\*\*,  $P < 0.001$  as determined by student's t-test in comparison to T3D/T1L L3S2.

519 **Figure 6.** Mutations in  $\mu 1$  hyperstabilize T3D. (A) ISVPs ( $2 \times 10^{11}$  particles/ml) of T3D  
520 and T3D with the indicated M2 mutations were divided into aliquots of equivalent  
521 volume and incubated at either 4°C or over a range of temperatures (32-46°C) for 20  
522 min. The reactions were chilled on ice and digested with 0.10 mg/ml trypsin for 30 min.  
523 Following addition of loading dye the samples were subjected to SDS-PAGE analysis.  
524 The gels shown are representative of at least 3 independent experiments. The position  
525 of major capsid proteins is shown.  $\mu 1$  runs as  $\mu 1C$ . (B) ISVPs generated from purified  
526 virions were divided into aliquots of equivalent volume and incubated at either 4°C or  
527 42°C for 20 min. Reactions were then diluted in PBS and subjected to plaque assay.  
528 The data are plotted as mean loss of infectivity for three independent samples in

529 comparison to samples incubated at 4°C. Error bars indicate SD. \*\*\*, P<0.001, \*\*,  
530 P<0.01 as determined by student's T-test in comparison to T3D.

531

532 **Figure 7.** T3D/T1L L3S2 affects viral replication. (A) L cell monolayers were infected  
533 with T3D or T3D/T1L L3S2 or with the indicated mutant viruses at an MOI of 0.1  
534 PFU/cell. At 0h and 24h post infection, the infected cells were lysed and the viral yield  
535 was quantified by plaque assay. Error bars indicate SD. \*, P<0.05, \*\*\*, P<0.001 as  
536 determined by student's t-test in comparison to T3D. (B) L cell monolayers were  
537 infected with the indicated viruses at an MOI of 10 PFU/cell. At 10h post infection, the  
538 cells were lysed and protein production was determined by immunoblotting. Protein  
539 quantification of 3 replicates normalized to PSTAIR is shown. Error bars indicate SD. \*\*,  
540 P<0.01, \*\*\*, P<0.001 as determined by student's t-test in comparison to T3D. (C) L cell  
541 monolayers were infected with the indicated viruses at an MOI of 10 PFU/cell. At the  
542 indicated times post infection, the cells were lysed and total RNA was isolated. cDNA  
543 was generated using primers for T3D S1 and GAPDH. mRNA production was measured  
544 by qPCR. Data shown are represented as fold change compared to mock infected  
545 samples and normalized to GAPDH. Error bars indicate SD. \*\*\*, P<0.001 as  
546 determined by student's t-test in comparison to T3D

547

548

549

550 **REFERENCES**

- 551 1. SABIN AB. 1959. Reoviruses. A new group of respiratory and enteric viruses  
552 formerly classified as ECHO type 10 is described. *Science* 130:1387–1389.
- 553 2. Gomatos PJ, Tamm I. 1963. THE SECONDARY STRUCTURE OF REOVIRUS  
554 RNA. *Proc Natl Acad Sci U S A* 49:707–714.
- 555 3. Bellamy AR, Shapiro L, August JT, Joklik WK. 1967. Studies on reovirus RNA. I.  
556 Characterization of reovirus genome RNA. *J Mol Biol* 29:1–17.
- 557 4. Dermody TS, Parker JSL, Sherry B. 2013. Orthoreoviruses, p 1304–1346. *Fields*  
558 *virology*. Lippincott Williams & Wilkins, Philadelphia, PA.
- 559 5. Gillies S, Bullivant S, Bellamy AR. 1971. Viral RNA Polymerases: Electron  
560 Microscopy of Reovirus Reaction Cores. *Science* (80- ) 174:694 LP – 696.
- 561 6. Skehel JJ, Joklik WK. 1969. Studies on the in vitro transcription of reovirus RNA  
562 catalyzed by reovirus cores. *Virology* 39:822–31.
- 563 7. Liemann S, Chandran K, Baker TS, Nibert ML, Harrison SC. 2002. Structure of  
564 the reovirus membrane-penetration protein,  $\mu 1$ , in a complex with its protector  
565 protein,  $\sigma 3$ . *Cell* 108:283–295.
- 566 8. Reinisch KM, Nibert ML, Harrison SC. 2000. Structure of the reovirus core at 3.6  
567 Å resolution. *Nature* 404:960–967.
- 568 9. Mao ZX, Joklik WK. 1991. Isolation and enzymatic characterization of protein  
569 lambda 2, the reovirus guanylyltransferase. *Virology* 185:377–386.
- 570 10. Baer GS, Dermody TS. 1997. Mutations in reovirus outer-capsid protein sigma3

- 571 selected during persistent infections of L cells confer resistance to protease  
572 inhibitor E64. *J Virol* 71:4921–4928.
- 573 11. Silverstein SC, Astell C, Levin DH, Schonberg M, Acs G. 1972. The mechanisms  
574 of reovirus uncoating and gene activation in vivo. *Virology* 47:797–806.
- 575 12. Dryden KA, Wang G, Yeager M, Nibert ML, Coombs KM, Furlong DB, Fields BN,  
576 Baker TS. 1993. Early steps in reovirus infection are associated with dramatic  
577 changes in supramolecular structure and protein conformation: analysis of virions  
578 and subviral particles by cryoelectron microscopy and image reconstruction. *J*  
579 *Cell Biol* 122:1023–1041.
- 580 13. Nibert ML, Fields BN. 1992. A carboxy-terminal fragment of protein  $\mu 1/\mu 1C$  is  
581 present in infectious subviral particles of mammalian reoviruses and is proposed  
582 to have a role in penetration. *J Virol* 66:6408–6418.
- 583 14. Borsa J, Sargent MD, Lievaart PA, Copps TP. 1981. Reovirus: evidence for a  
584 second step in the intracellular uncoating and transcriptase activation process.  
585 *Virology* 111:191–200.
- 586 15. Nibert ML, Odegard AL, Agosto MA, Chandran K, Schiff LA. 2005. Putative  
587 autocleavage of reovirus  $\mu 1$  protein in concert with outer-capsid disassembly  
588 and activation for membrane permeabilization. *J Mol Biol* 345:461–474.
- 589 16. Odegard AL, Chandran K, Zhang X, Parker JSL, Baker TS, Nibert ML. 2004.  
590 Putative autocleavage of outer capsid protein  $\mu 1$ , allowing release of  
591 myristoylated peptide  $\mu 1N$  during particle uncoating, is critical for cell entry by  
592 reovirus. *J Virol* 78:8732–8745.

- 593 17. Zhang L, Chandran K, Nibert ML, Harrison SC. 2006. Reovirus  $\mu$ 1 structural  
594 rearrangements that mediate membrane penetration. *J Virol* 2006/09/27.  
595 80:12367–12376.
- 596 18. Chandran K, Farsetta DL, Nibert ML. 2002. Strategy for nonenveloped virus entry:  
597 a hydrophobic conformer of the reovirus membrane penetration protein  $\mu$ 1  
598 mediates membrane disruption. *J Virol* 76:9920–33.
- 599 19. Snyder AJ, Wang JC-Y, Danthi P. 2019. Components of the Reovirus Capsid  
600 Differentially Contribute to Stability. *J Virol* 93:e01894-18.
- 601 20. Thete D, Danthi P. 2018. Protein mismatches caused by reassortment influence  
602 functions of the reovirus capsid. *bioRxiv*.
- 603 21. Snyder AJ, Wang JC-Y, Danthi P. 2018. The reovirus  $\mu$ 1 protein contributes to the  
604 environmental stability of virions. *bioRxiv*.
- 605 22. Harrison SJ, Farsetta DL, Kim J, Noble S, Broering TJ, Nibert ML. 1999.  
606 Mammalian reovirus L3 gene sequences and evidence for a distinct amino-  
607 terminal region of the  $\lambda$ 1 protein. *Virology* 258:54–64.
- 608 23. Xu W, Coombs KM. 2009. Conserved structure/function of the orthoreovirus major  
609 core proteins. *Virus Res* 144:44–57.
- 610 24. Chapell JD, Goral MI, Rodgers SE, dePamphilis CW, Dermody TS. 1994.  
611 Sequence diversity within the reovirus S2 gene: reovirus genes reassort in nature,  
612 and their termini are predicted to form a panhandle motif. *J Virol* 68:750–756.
- 613 25. Zhang X, Ji Y, Zhang L, Harrison SC, Marinescu DC, Nibert ML, Baker TS. 2005.



- 614 Features of reovirus outer capsid protein mu1 revealed by electron  
615 cryomicroscopy and image reconstruction of the virion at 7.0 Angstrom resolution.  
616 Structure 13:1545–1557.
- 617 26. Snyder AJ, Danthi P. 2018. Infectious Subviral Particle to Membrane Penetration  
618 Active Particle (ISVP-to-ISVP\*) Conversion Assay for Mammalian Orthoreovirus.  
619 Bio-protocol 8:e2700.
- 620 27. Snyder AJ, Danthi P. 2015. Lipid Membranes Facilitate Conformational Changes  
621 Required for Reovirus Cell Entry. J Virol 90:2628–2638.
- 622 28. Middleton JK, Severson TF, Chandran K, Gillian AL, Yin J, Nibert ML. 2002.  
623 Thermostability of reovirus disassembly intermediates (ISVPs) correlates with  
624 genetic, biochemical, and thermodynamic properties of major surface protein  
625 mu1. J Virol 76:1051–61.
- 626 29. Lemay G, Danis C. 1994. Reovirus  $\lambda$ 1 protein: Affinity for double-stranded nucleic  
627 acids by a small amino-terminal region of the protein independent from the zinc  
628 finger motif. J Gen Virol 75:3261–3266.
- 629 30. Bisailon M, Bergeron J, Lemay G. 1997. Characterization of the nucleoside  
630 triphosphate phosphohydrolase and helicase activities of the reovirus  $\lambda$ 1 protein. J  
631 Biol Chem 272:18298–18303.
- 632 31. Middleton JK, Agosto MA, Severson TF, Yin J, Nibert ML. 2007.  
633 Thermostabilizing mutations in reovirus outer-capsid protein mu1 selected by heat  
634 inactivation of infectious subvirion particles. Virology2007/01/17. 361:412–425.

- 635 32. Agosto MA, Middleton JK, Freimont EC, Yin J, Nibert ML. 2007. Thermolabilizing  
636 Pseudoreversions in Reovirus Outer-Capsid Protein  $\mu$ 1 Rescue the Entry Defect  
637 Conferred by a Thermostabilizing Mutation. *J Virol* 81:7400 LP – 7409.
- 638 33. Sarkar P, Danthi P. 2010. Determinants of strain-specific differences in efficiency  
639 of reovirus entry. *J Virol* 84:12723–12732.
- 640 34. Drayna D, Fields BN. 1982. Biochemical studies on the mechanism of chemical  
641 and physical inactivation of reovirus. *J Gen Virol* 63 (Pt 1):161–170.
- 642 35. Wessner DR, Fields BN. 1993. Isolation and genetic characterization of ethanol-  
643 resistant reovirus mutants. *J Virol* 67:2442–2447.
- 644 36. Liemann S, Chandran K, Baker TS, Nibert ML, Harrison SC. 2002. Structure of  
645 the reovirus membrane-penetration protein,  $\mu$ 1, in a complex with its protector  
646 protein,  $\sigma$ 3. *Cell* 108:283–295.
- 647 37. Farsetta DL, Chandran K, Nibert ML. 2000. Transcriptional activities of reovirus  
648 RNA polymerase in re-coated cores. Initiation and elongation are regulated by  
649 separate mechanisms. *J Biol Chem* 275:39693–39701.
- 650 38. McDonald SM, Tao YJ, Patton JT. 2009. The ins and outs of four-tunneled  
651 Reoviridae RNA-dependent RNA polymerases. *Curr Opin Struct Biol* 2009/11/14.  
652 19:775–782.
- 653 39. Hooper JW, Fields BN. 1996. Role of the  $\mu$  1 protein in reovirus stability and  
654 capacity to cause chromium release from host cells. *J Virol* 70:459–467.
- 655 40. Agosto MA, Myers KS, Ivanovic T, Nibert ML. 2008. A positive-feedback

- 656 mechanism promotes reovirus particle conversion to the intermediate associated  
657 with membrane penetration. Proc Natl Acad Sci U S A 105:10571–6.
- 658 41. Snyder AJ, Danthi P. 2016. Lipids Cooperate with the Reovirus Membrane  
659 Penetration Peptide to Facilitate Particle Uncoating. J Biol Chem 2016/11/15.  
660 291:26773–26785.
- 661 42. Ivanovic T, Agosto MA, Zhang L, Chandran K, Harrison SC, Nibert ML. 2008.  
662 Peptides released from reovirus outer capsid form membrane pores that recruit  
663 virus particles. EMBO J 27:1289–98.
- 664 43. Zhang X, Walker SB, Chipman PR, Nibert ML, Baker TS. 2003. Reovirus  
665 polymerase  $\lambda 3$  localized by cryo-electron microscopy of virions at a resolution of  
666 7.6 Å. Nat Struct Mol Biol 10:1011–1018.
- 667 44. Simon EJ, Howells MA, Stuart JD, Boehme KW. 2017. Serotype-specific killing of  
668 large cell carcinoma cells by reovirus. Viruses 9.
- 669 45. Dermody TS, Schiff LA, Nibert ML, Coombs KM, Fields BN. 1991. The S2 gene  
670 nucleotide sequences of prototype strains of the three reovirus serotypes:  
671 characterization of reovirus core protein sigma 2. J Virol 65:5721–5731.
- 672 46. Sherry B, Torres J, Blum MA. 1998. Reovirus induction of and sensitivity to beta  
673 interferon in cardiac myocyte cultures correlate with induction of myocarditis and  
674 are determined by viral core proteins. J Virol 72:1314–23.
- 675 47. Thete D, Danthi P. 2015. Conformational changes required for reovirus cell entry  
676 are sensitive to pH. Virology 483:291–301.

- 677 48. Boehme KW, Ikizler M, Kobayashi T, Dermody TS. 2011. Reverse genetics for  
678 mammalian reovirus. *Methods* 55:109–113.
- 679 49. Sarkar P, Danthi P. 2010. Determinants of strain-specific differences in efficiency  
680 of reovirus entry. *J Virol* 2010/10/13. 84:12723–12732.
- 681 50. Furlong DB, Nibert ML, Fields BN. 1988. Sigma 1 protein of mammalian  
682 reoviruses extends from the surfaces of viral particles. *J Virol* 62:246–256.
- 683 51. Mendez II, Hermann LL, Hazelton PR, Coombs KM. 2000. A comparative analysis  
684 of freon substitutes in the purification of reovirus and calicivirus. *J Virol Methods*  
685 90:59–67.
- 686 52. Smith RE, Zweerink HJ, Joklik WK. 1969. Polypeptide components of virions, top  
687 component and cores of reovirus type 3. *Virology* 39:791–810.
- 688 53. Schmittgen TD, Livak KJ. 2008. Analyzing real-time PCR data by the comparative  
689 C(T) method. *Nat Protoc* 3:1101–1108.
- 690 54. Pettersen EF, Goddard TD, Huang CC, Couch GS, Greenblatt DM, Meng EC,  
691 Ferrin TE. 2004. UCSF Chimera--a visualization system for exploratory research  
692 and analysis. *J Comput Chem* 25:1605–1612.
- 693
- 694

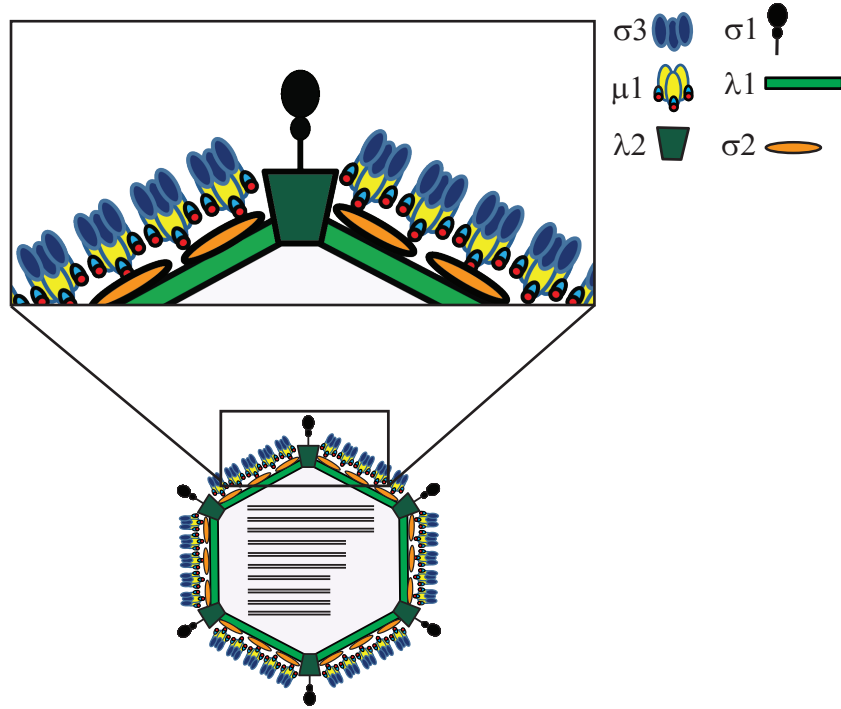

Figure 1. Schematic representation of reovirus capsid proteins.

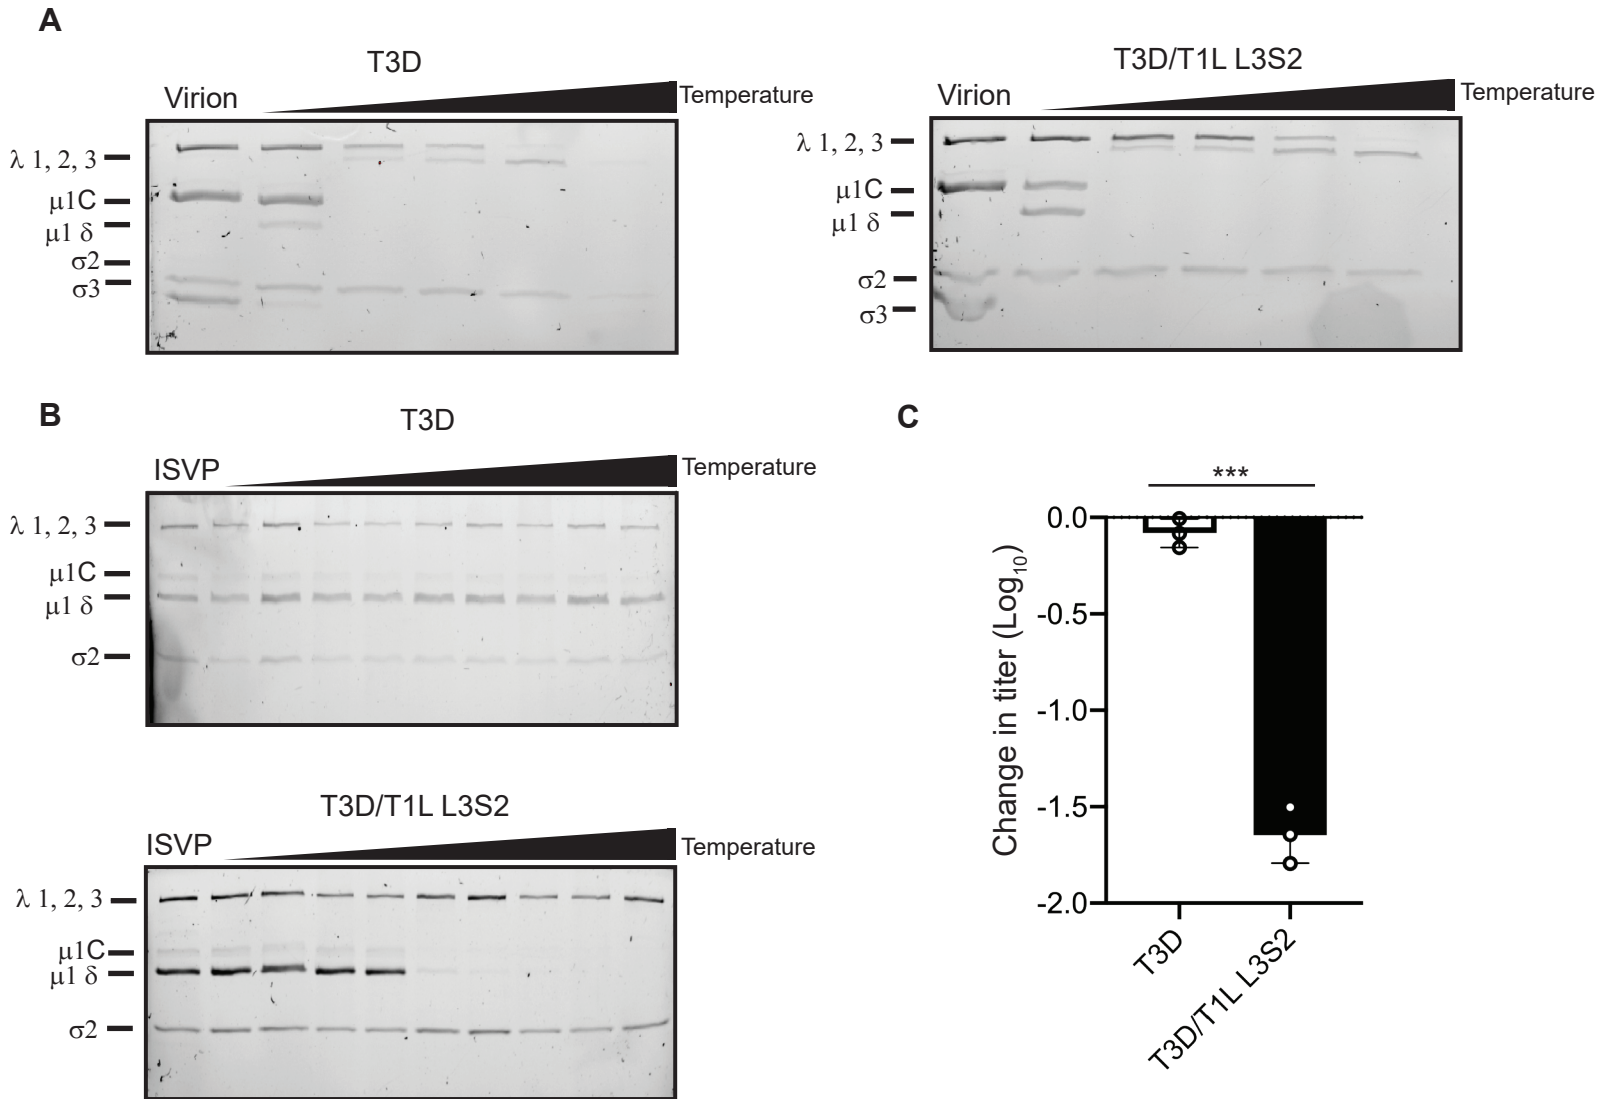

**Figure 2.** T3D/T1L L3S2 exhibits increased efficiency of ISVP to ISVP\* conversion in vitro. (A) T3D and T3D/T1L L3S2 virions ( $2 \times 10^{12}$  particles/ml) were divided into aliquots of equal volume and incubated at either  $4^{\circ}\text{C}$  or over a range of temperatures ( $65\text{--}85^{\circ}\text{C}$ ) for 5 min. The reactions were chilled on ice and digested with  $0.10\text{ mg/ml}$  trypsin for 30 min. Following addition of loading dye, the samples were subjected to SDS-PAGE analysis. The positions of major capsid proteins are shown.  $\mu 1$  runs as  $\mu 1\text{C}$  (15). (B) ISVPs ( $2 \times 10^{11}$  particles/ml) of T3D or T3D/T1L L3S2 were divided into aliquots of equivalent volume and incubated either at  $4^{\circ}\text{C}$  or over a range of temperatures ( $22\text{--}42^{\circ}\text{C}$ ) for 20 min. The reactions were chilled on ice and digested with  $0.10\text{ mg/ml}$  trypsin for 30 min. Following addition of loading dye the samples were subjected to SDS-PAGE analysis. The gels shown are representative of at least 3 independent experiments. The position of major capsid proteins is shown.  $\mu 1$  runs as  $\mu 1\text{C}$ . (C) ISVPs generated from P2 stocks of the indicated virus strain were divided into aliquots of equivalent volume and incubated at either  $4^{\circ}\text{C}$  or  $40^{\circ}\text{C}$  for 20 min. Reactions were then diluted in PBS and subjected to plaque assay. The data are plotted as mean loss of infectivity for three independent samples in comparison to samples incubated at  $4^{\circ}\text{C}$ . Error bars indicate SD. \*,  $P < 0.05$  as determined by student's t-test in comparison to T3D.

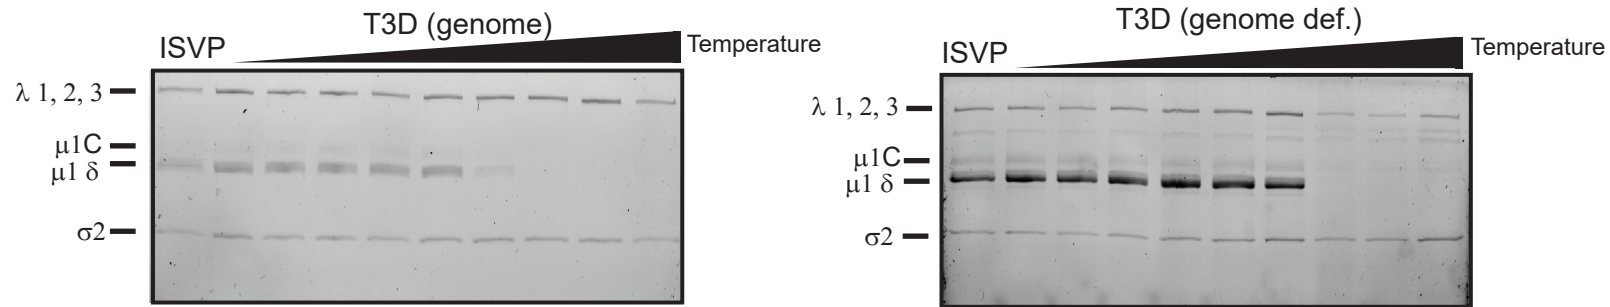

**Figure 3.** Increased ISVP to ISVP\* efficiency in T3D/T1L L3S2 is not due to altered interactions with viral RNA. ISVPs ( $2 \times 10^{11}$  particles/ml) derived from genome-containing or genome-deficient particles of strain T3D were divided into aliquots of equivalent volume and incubated at either  $4^{\circ}\text{C}$  or over a range of temperatures ( $22\text{-}40^{\circ}\text{C}$ ) for 20 min. The reactions were chilled on ice and digested with  $0.10$  mg/ml trypsin for 30 min. Following addition of loading dye the samples were subjected to SDS-PAGE analysis. The position of major capsid proteins is shown.  $\mu 1$  runs as  $\mu 1\text{C}$ .

A

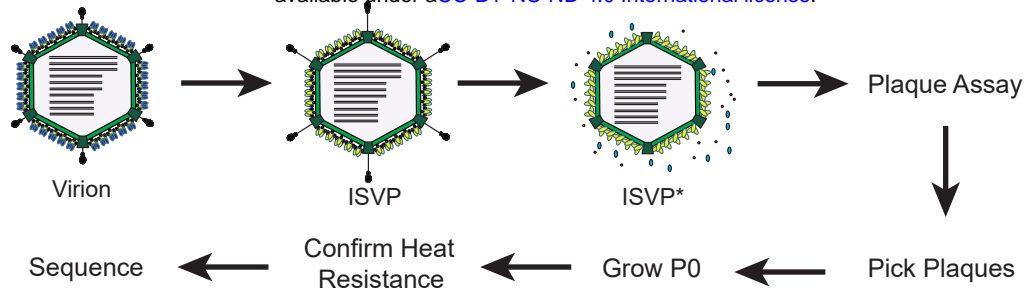

B

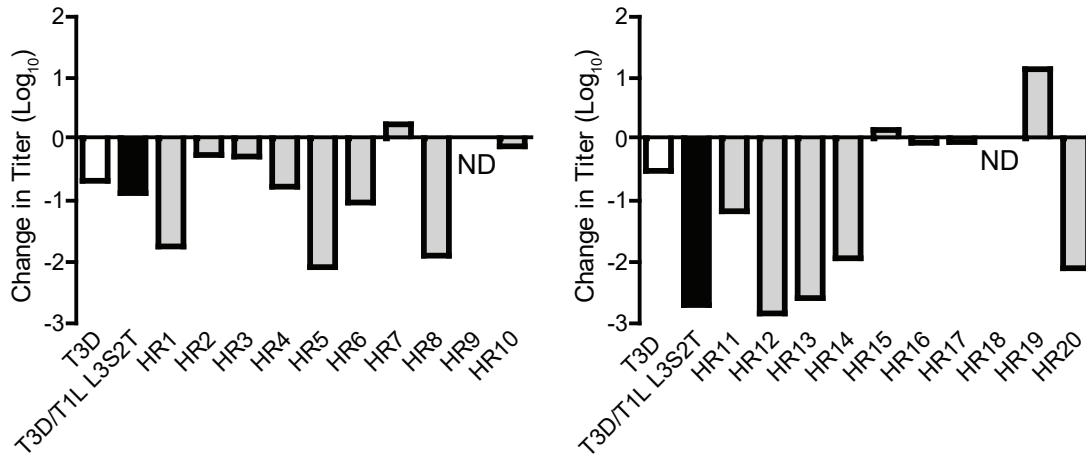

C

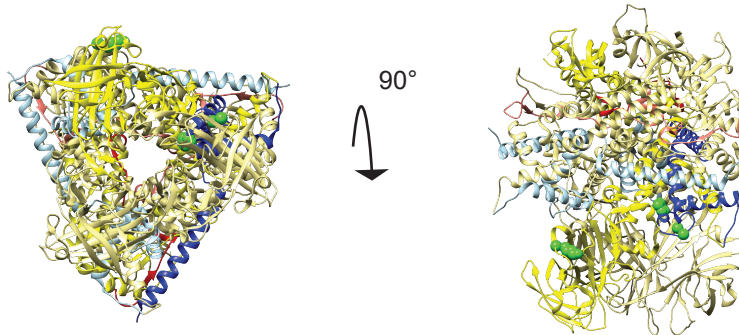

D

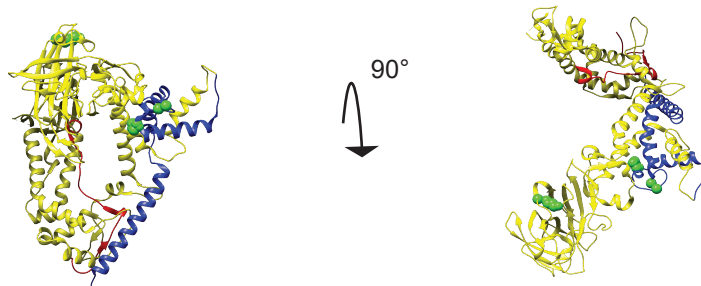

E

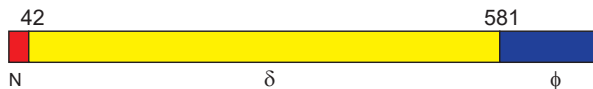

**Figure 4.** Selection of viruses with mutations that confer stability to T3D/T1L L3S2 ISVPs. (A) Diagram depicting the process for selecting for mutants with reduced ISVP-ISVP\* conversion efficiency of T3D/T1L L3S2. ISVPs of T3D/T1L L3S2 were incubated at 40°C for 20 min. Reactions were then diluted in PBS and subjected to plaque assay. Viruses from resulting plaques were isolated and propagated to generate P0 stocks. Heat resistance of these putative heat resistant (HR) plaque isolates was confirmed by measuring the thermal stability of ISVPs incubated at 4°C or 40°C using a plaque assay. Mutants that were confirmed as heat resistant were sequenced. (B) ISVPs generated from P0 stocks were incubated at either 4°C or 40°C for 20 min. Reactions were then diluted in PBS and subjected to plaque assay. ND, Not detectable. (C, D) Top (left) and side (right) views of  $\mu$ 1 trimer (C) and monomer (D) are shown. Position of mutations identified in HR viruses are shown in green.  $\mu$ 1 cleavage fragments are colored as indicated (E) with one  $\mu$ 1 monomer shown with darker colors.



**A**

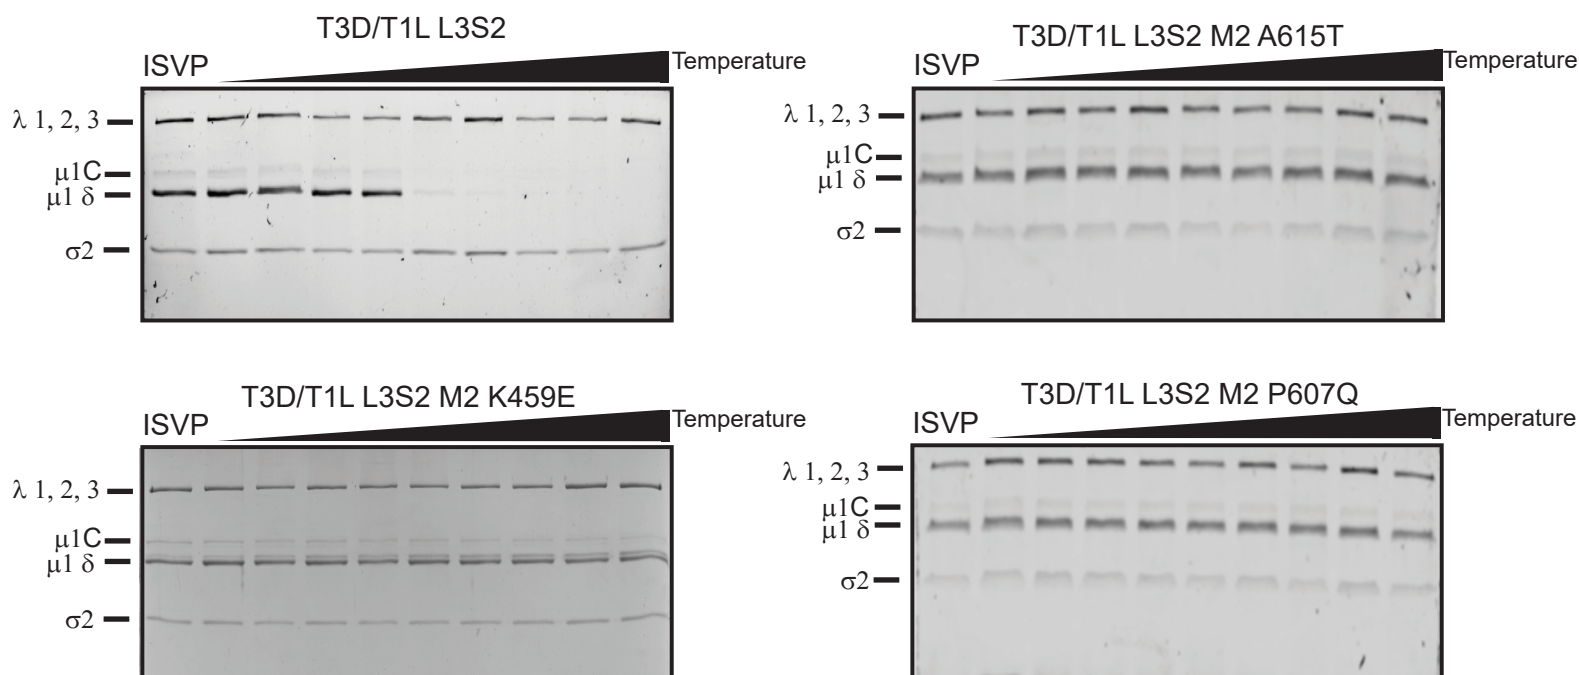

**B**

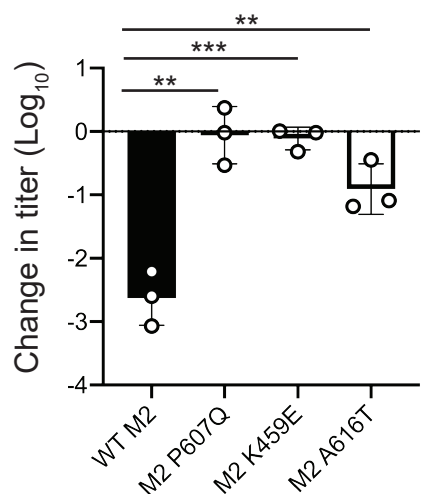

**Figure 5.** Mutations in  $\mu 1$  restore stability of T3D/T1L L3S2. (A) ISVPs ( $2 \times 10^{11}$  particles/ml) of T3D/T1L L3S2 with the indicated M2 mutations were divided into aliquots of equivalent volume and incubated at either  $4^{\circ}\text{C}$  or over a range of temperatures ( $22\text{--}42^{\circ}\text{C}$ ) for 20 min. The reactions were chilled on ice and digested with  $0.10$  mg/ml trypsin for 30 min. Following addition of loading dye the samples were subjected to SDS-PAGE analysis. The gels shown are representative of at least 3 independent experiments. The position of major capsid proteins is shown.  $\mu 1$  runs as  $\mu 1\text{C}$ . (B) ISVPs generated from P2 stocks of the indicated virus strain were divided into aliquots of equivalent volume and incubated at either  $4^{\circ}\text{C}$  or  $40^{\circ}\text{C}$  for 20 min. Reactions were then diluted in PBS and subjected to plaque assay. The data are plotted as mean loss of infectivity for three independent samples in comparison to samples incubated at  $4^{\circ}\text{C}$ . Error bars indicate SD. \*\*,  $P < 0.01$ , \*\*\*,  $P < 0.001$  as determined by student's t-test in comparison to T3D/T1L L3S2.

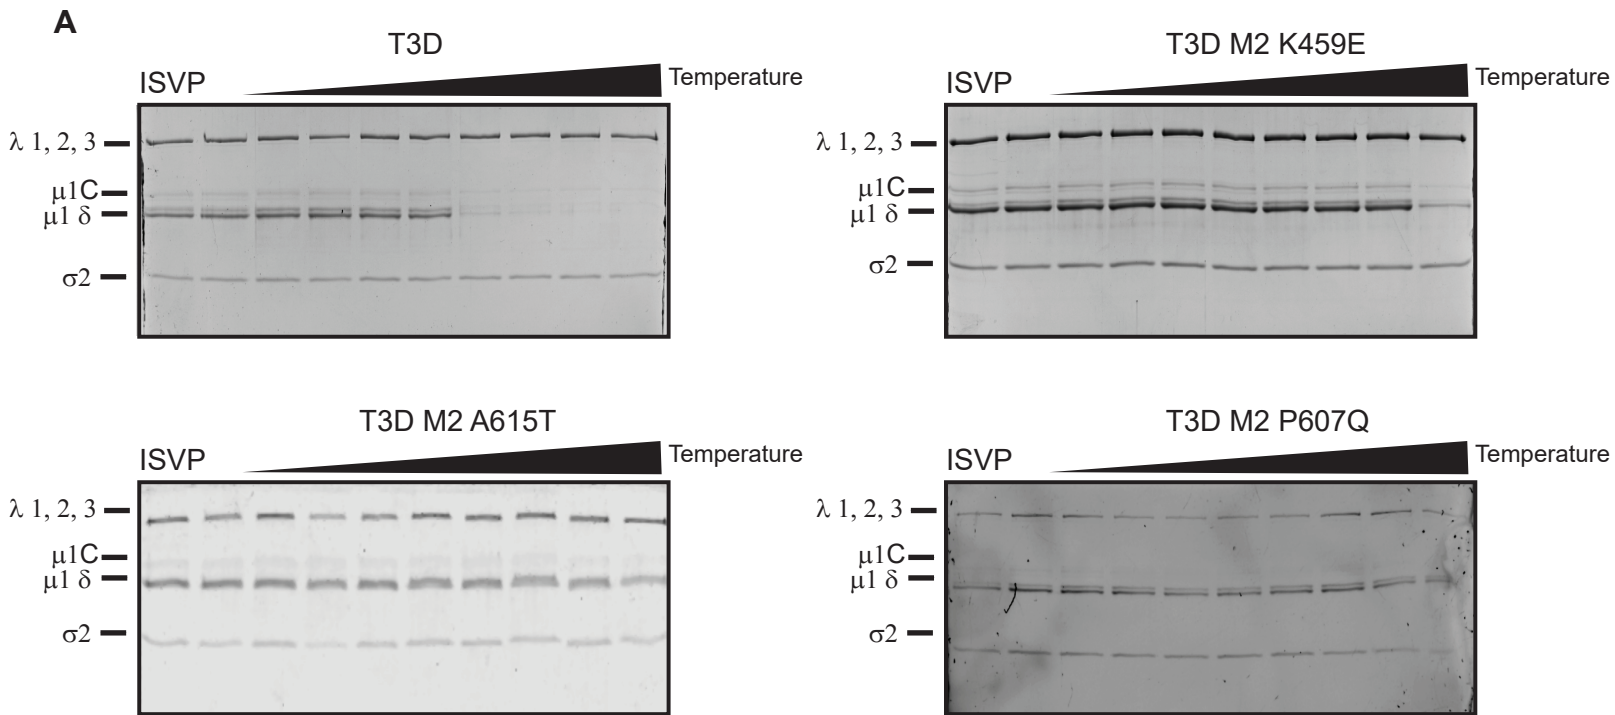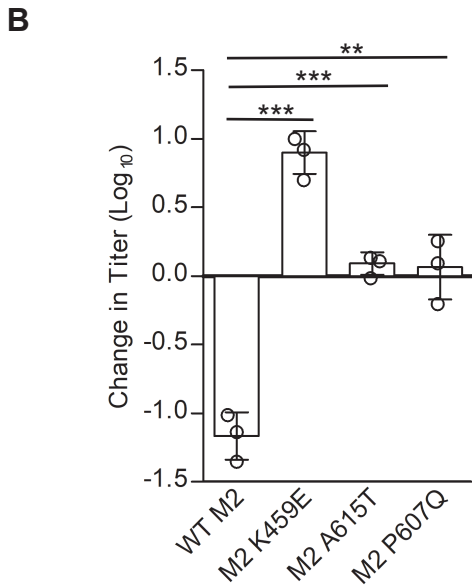

**Figure 6.** Mutations in  $\mu 1$  hyperstabilize T3D. (A) ISVPs ( $2 \times 10^{11}$  particles/ml) of T3D and T3D with the indicated M2 mutations were divided into aliquots of equivalent volume and incubated at either  $4^{\circ}\text{C}$  or over a range of temperatures ( $32\text{--}46^{\circ}\text{C}$ ) for 20 min. The reactions were chilled on ice and digested with  $0.10$  mg/ml trypsin for 30 min. Following addition of loading dye the samples were subjected to SDS-PAGE analysis. The gels shown are representative of at least 3 independent experiments. The position of major capsid proteins is shown.  $\mu 1$  runs as  $\mu 1\text{C}$ . (B) ISVPs generated from purified virions were divided into aliquots of equivalent volume and incubated at either  $4^{\circ}\text{C}$  or  $42^{\circ}\text{C}$  for 20 min. Reactions were then diluted in PBS and subjected to plaque assay. The data are plotted as mean loss of infectivity for three independent samples in comparison to samples incubated at  $4^{\circ}\text{C}$ . Error bars indicate SD. \*\*\*,  $P < 0.001$ , \*\*,  $P < 0.01$  as determined by student's t-test in comparison to T3D/T1L L3S2.

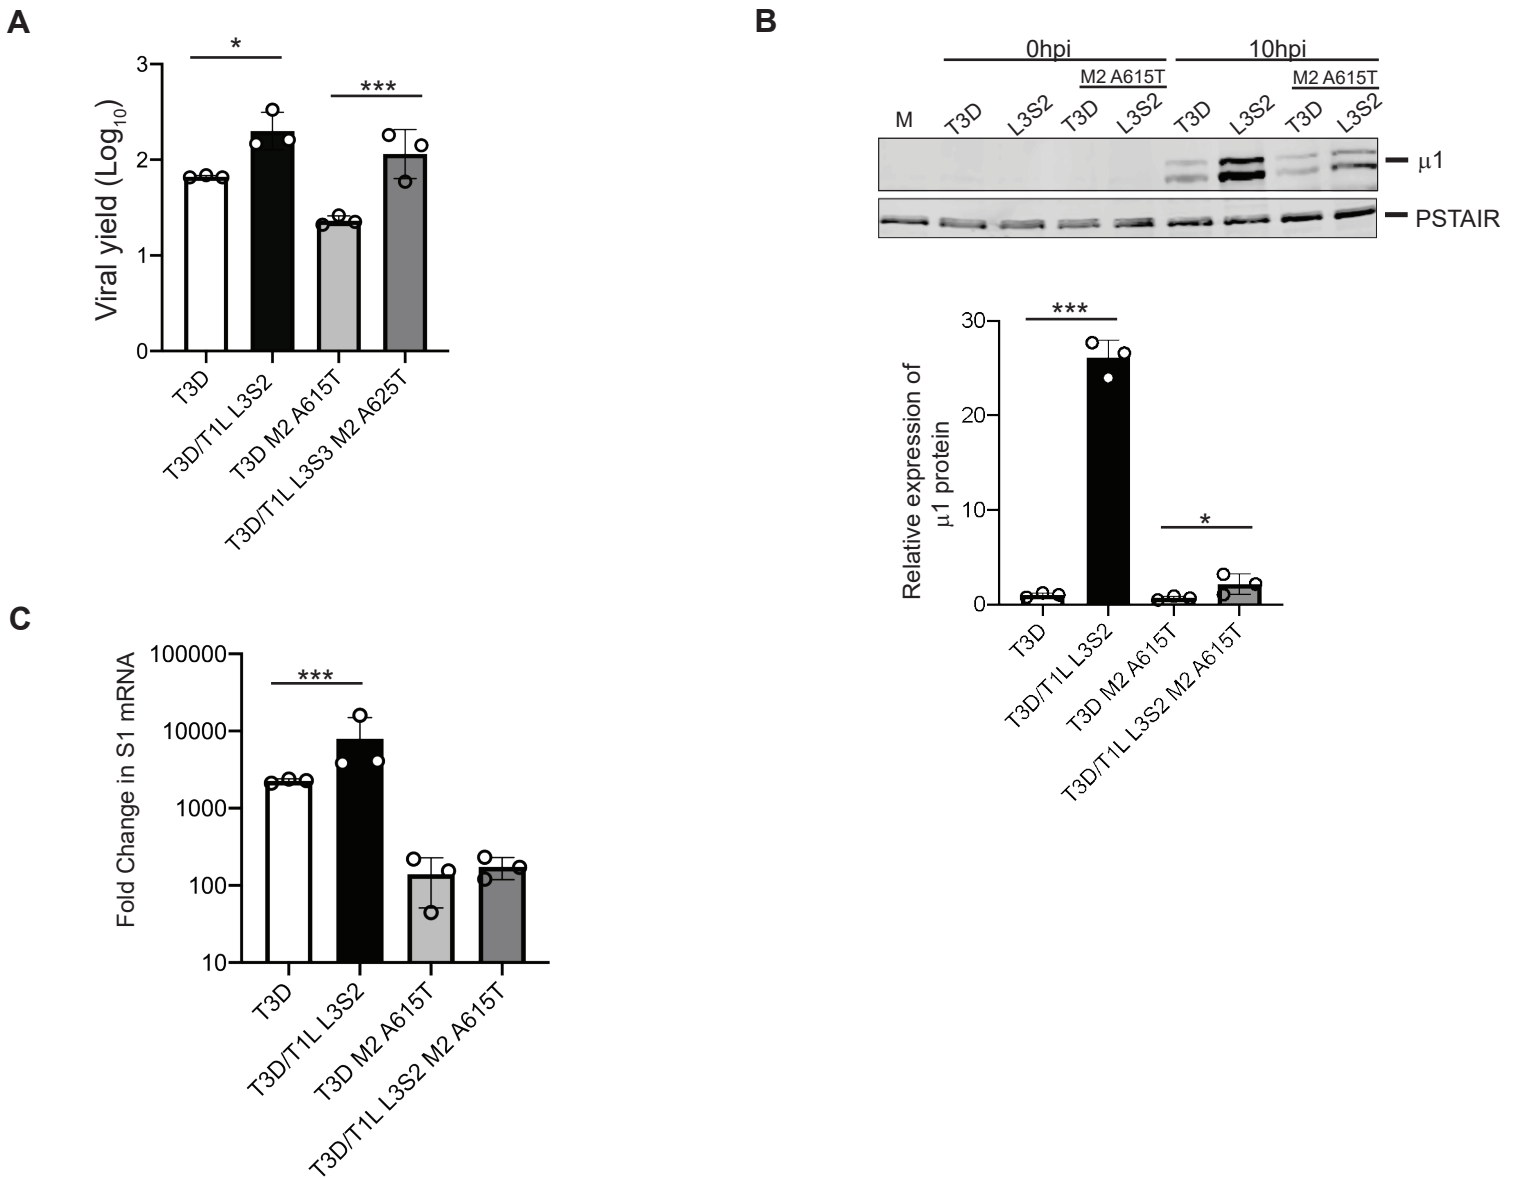

**Figure 7.** T3D/T1L L3S2 affects viral replication. (A) L cell monolayers were infected with T3D or T3D/T1L L3S2 or with the indicated mutant viruses at an MOI of 0.1 PFU/cell. At 0h and 24h post infection, the infected cells were lysed and the viral yield was quantified by plaque assay. Error bars indicate SD. \*,  $P < 0.05$ , \*\*\*,  $P < 0.001$  as determined by student's t-test in comparison to T3D. (B) L cell monolayers were infected with the indicated viruses at an MOI of 10 PFU/cell. At 10h post infection, the cells were lysed and protein production was determined by immunoblotting. Protein quantification of 3 replicates normalized to PSTAIR is shown. Error bars indicate SD. \*\*,  $P < 0.01$ , \*\*\*,  $P < 0.001$  as determined by student's t-test in comparison to T3D. (C) L cell monolayers were infected with the indicated viruses at an MOI of 10 PFU/cell. At the indicated times post infection, the cells were lysed and total RNA was isolated. cDNA was generated using primers for T3D S1 and GAPDH. mRNA production was measured by qPCR. Data shown are represented as fold change compared to mock infected samples and normalized to GAPDH. Error bars indicate SD. \*\*\*,  $P < 0.001$  as determined by student's t-test in comparison to T3D
